# Supplementary material for: Evolution of Documents Related to Biomechanics Research in Gymnastics
Source: MDPI journal article supplement (doi:10.3390/biomechanics3040039), 2023-10-11
Supplement: s1 [file s1]

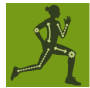

A bibliometric review enables the authors, and the readers to identify and analyse the most predominant authors, countries, institutions, or organizations which contribute to developing studies related to one topic. In the present study, some phases have been followed to carry out the bibliometric analysis of the studies:

**Phase 1. Planning the review and the topic.** It is defined the purpose and the protocol to follow for the review.

**Phase 2. Selecting the keywords.** The key terms for the search must be defined at the beginning of the study, to identify the most relevant documents related to the topic selected.

**Phase 3. Searching the documents.** The documents search was carried out in the Web of Science database, due to the fact that it is the database with the highest number of documents indexed. Figure 1 shows the flow chart of the search, and, the results obtained in each phase, as well as the documents deleted and their reason.

**Phase 4. Documents access and information treatment.** Using VOSViewer and Excel software, the information obtained was analysed and the results were extracted.

**Phase 5. Drawing conclusions.** After the extraction of the results, the conclusions must be made at the end of the document.
